# Supplementary material for: TPGS-b-PBAE Copolymer-Based Polyplex Nanoparticles for Gene Delivery and Transfection In Vivo and In Vitro
Source: MDPI journal article supplement (doi:10.3390/pharmaceutics16020213), 2024-01-31
Supplement: s1 [file s1]

Supplementary Material:

# TPGS-b-PBAE Copolymer-Based Polyplex Nanoparticles for Gene Delivery and Transfection In Vivo and In Vitro

Jiahui Ding <sup>1,†</sup>, Handan Zhang <sup>1,†</sup>, Tianli Dai <sup>1</sup>, Xueqin Gao <sup>2</sup>, Zhongyuan Yin <sup>3</sup>, Qiong Wang <sup>3</sup>, Mengqi Long <sup>4,\*</sup> and Songwei Tan <sup>1,\*</sup>

<sup>1</sup> School of Pharmacy, Tongji Medical College, Huazhong University of Science and Technology, Wuhan 430030, China; m201975433@alumni.hust.edu.cn (J.D.); m202175567@hust.edu.cn (H.Z.)

<sup>2</sup> Department of Pharmacy, Union Hospital, Tongji Medical College, Huazhong University of Science and Technology, Wuhan 430022, China

<sup>3</sup> Cancer Center, Union Hospital, Tongji Medical College, Huazhong University of Science and Technology, Wuhan 430022, China; wdyxywq@hust.edu.cn (Q.W.)

<sup>4</sup> Department of Otolaryngology, The Fifth Affiliated Hospital of Sun Yat-sen University, Meihua 52nd Road, Xiangzhou District, Zhuhai 510009, China

\* Correspondence: longmq5@mail.sysu.edu.cn (M.L.); tansw@hust.edu.cn (S.T.)

† These authors contributed equally to this work.

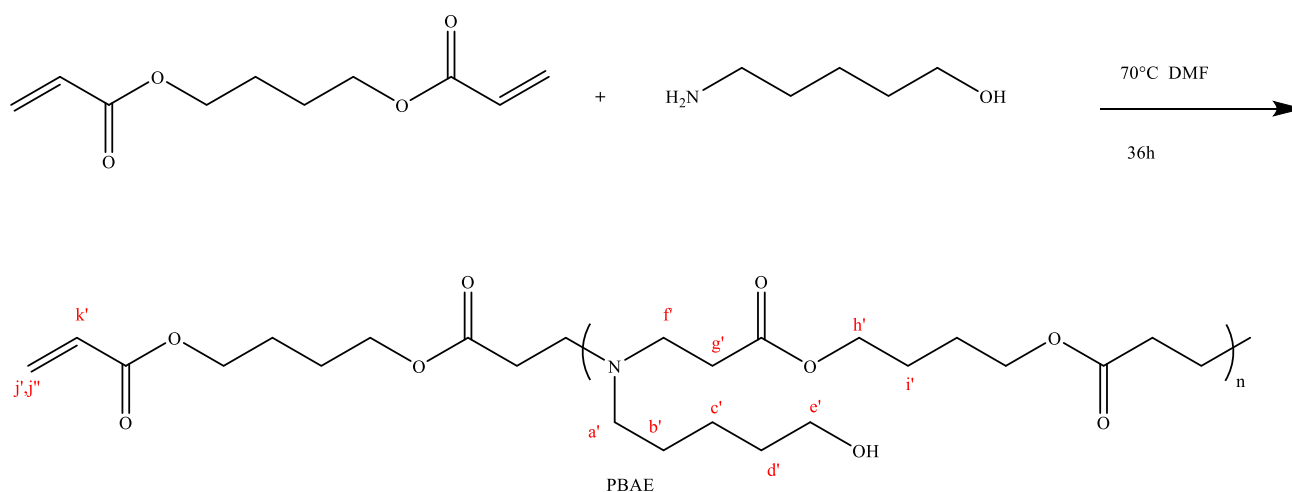

Figure S1. Synthesis of PBAE

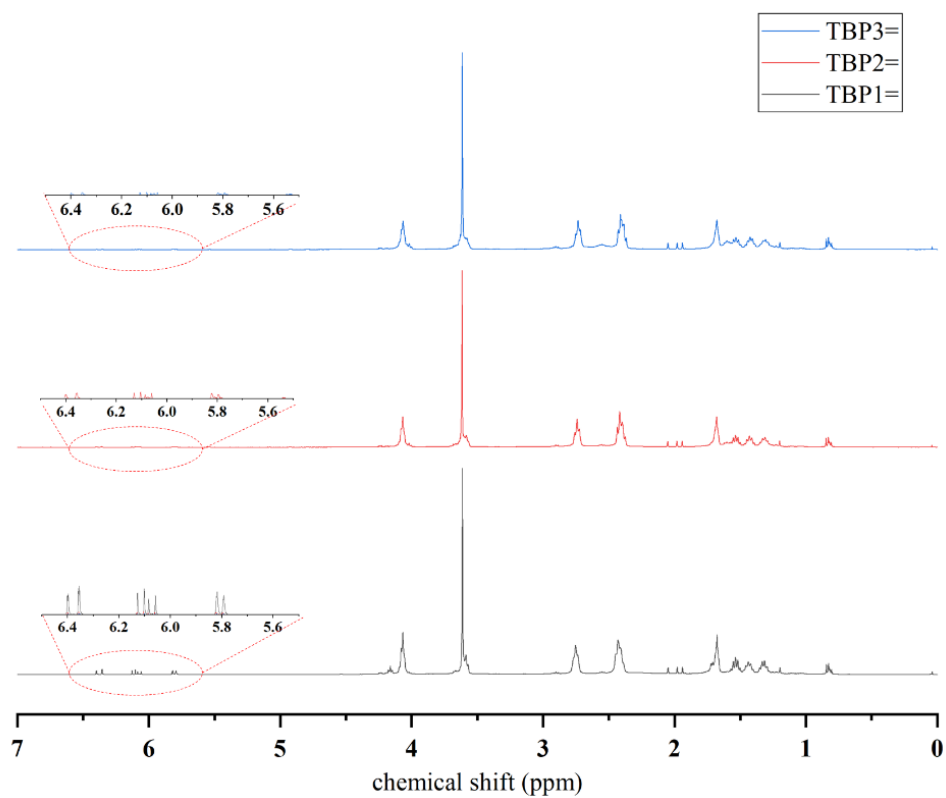

Figure S2.  $^1\text{H}$ -NMR spectrum of TBP1=, TBP2=, TBP3=

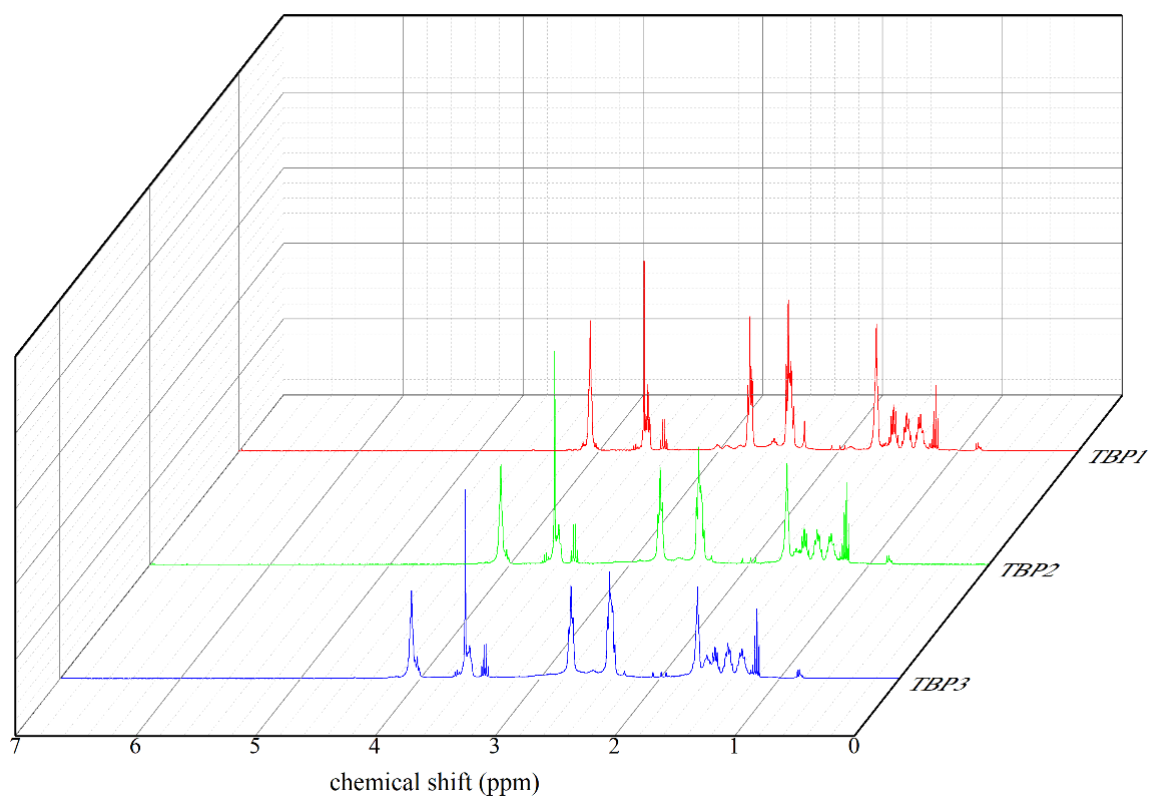

Figure S3.  $^1\text{H}$ -NMR spectrum of TBP1, TBP2, TBP3

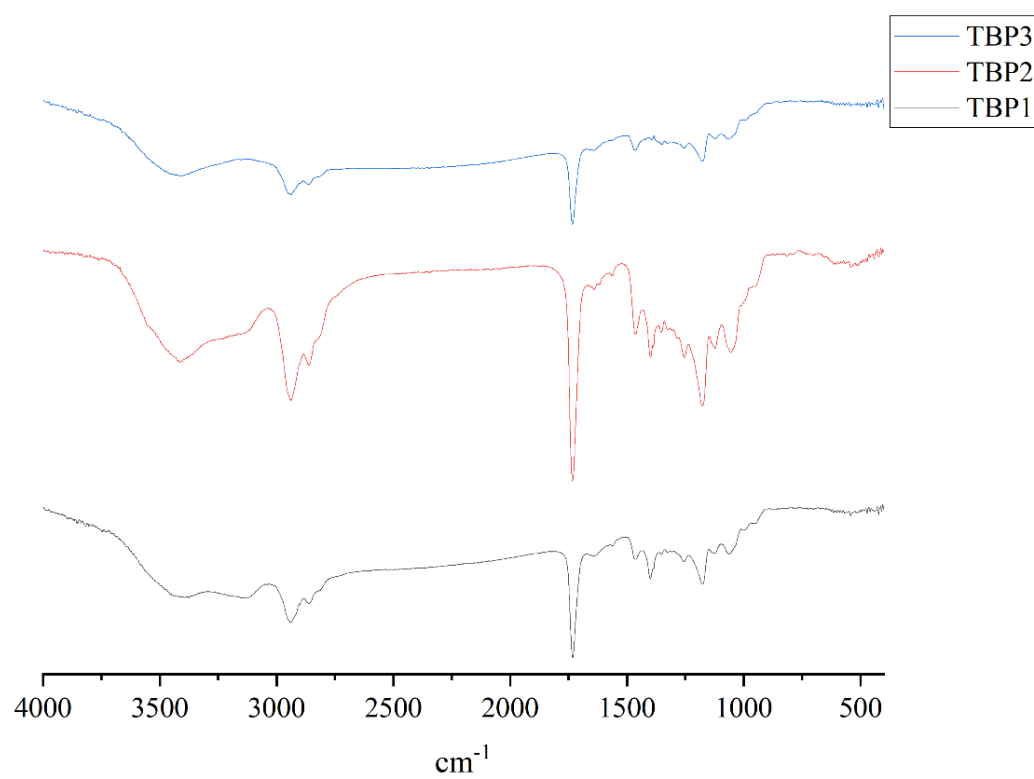

Figure S4. FT-IR spectrum of TBP1, TBP2, TBP3

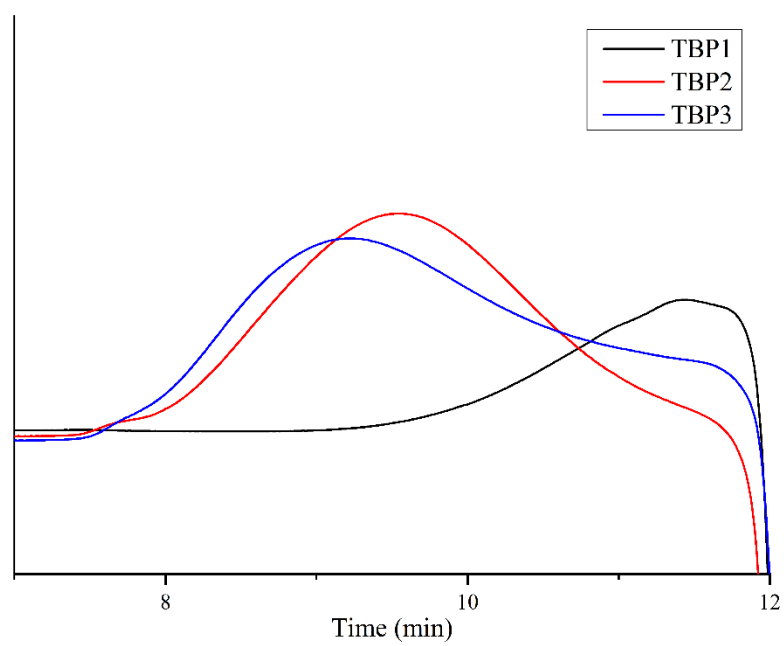

Figure S5. GPC chromatograms of TBP1, TBP2, TBP3

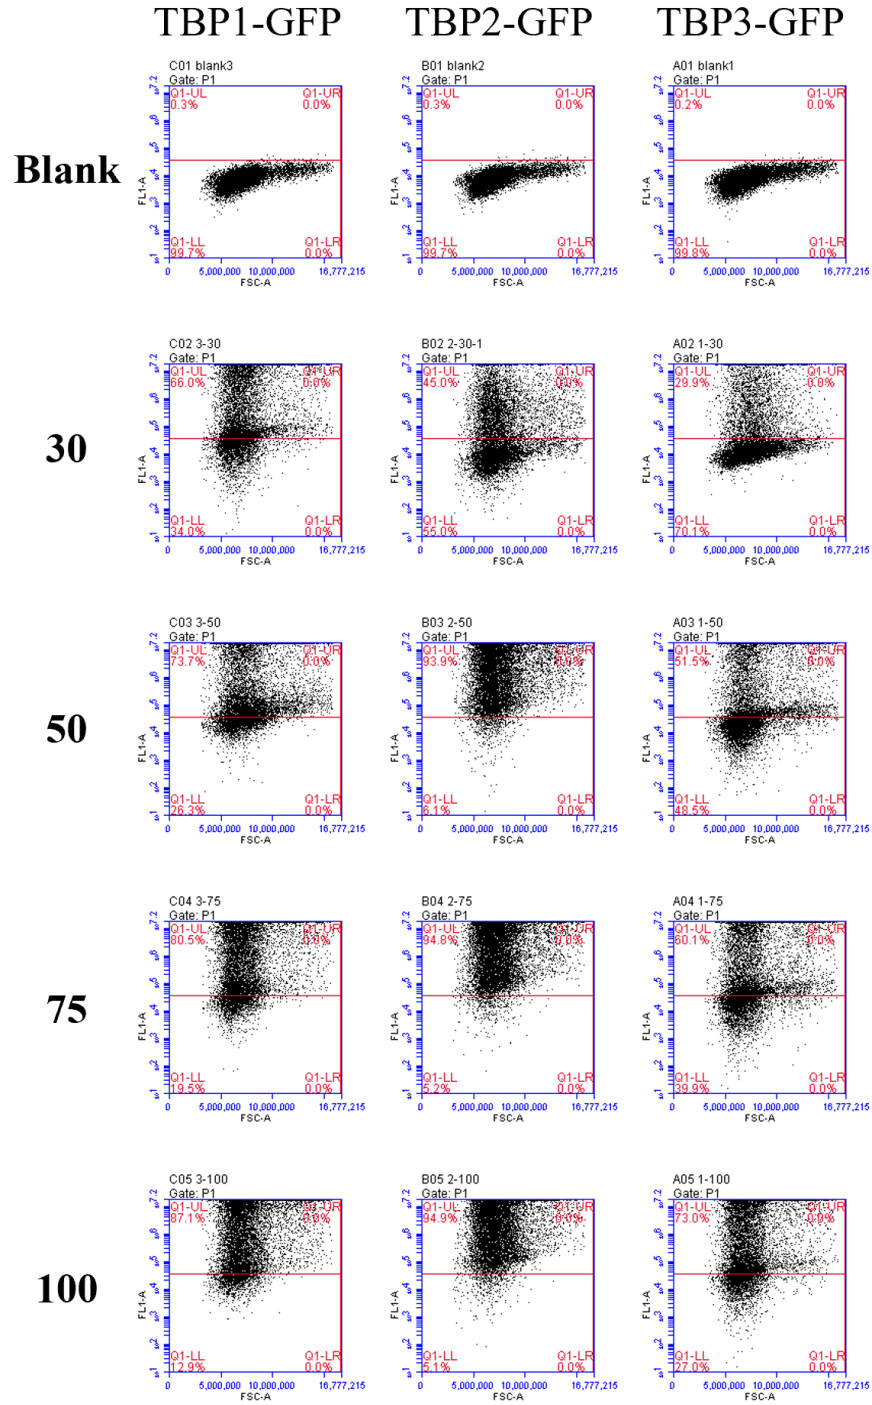

Figure S6. Representative cytometric analysis of transfection efficiency of 293T with TBP1, TBP2, TBP3-GFP polyplex NPs at mass ratio of 30:1, 50:1, 75:1, 100:1. (UL: GFP positive, LL: GFP negative)

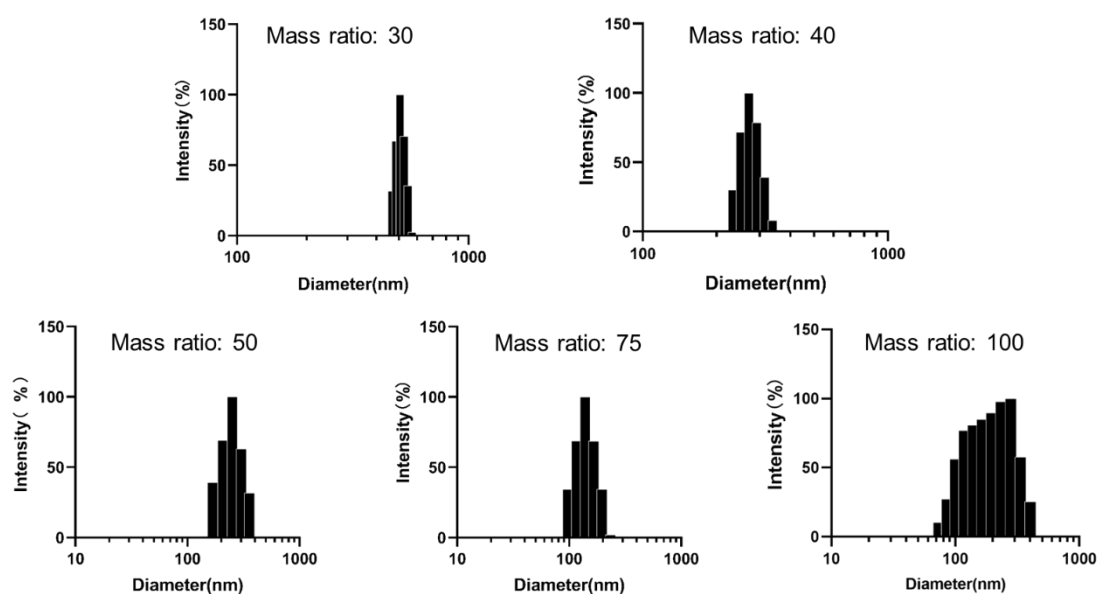

Figure S7. DLS results of TBP2-GFP polyplex NPs at different mass ratios

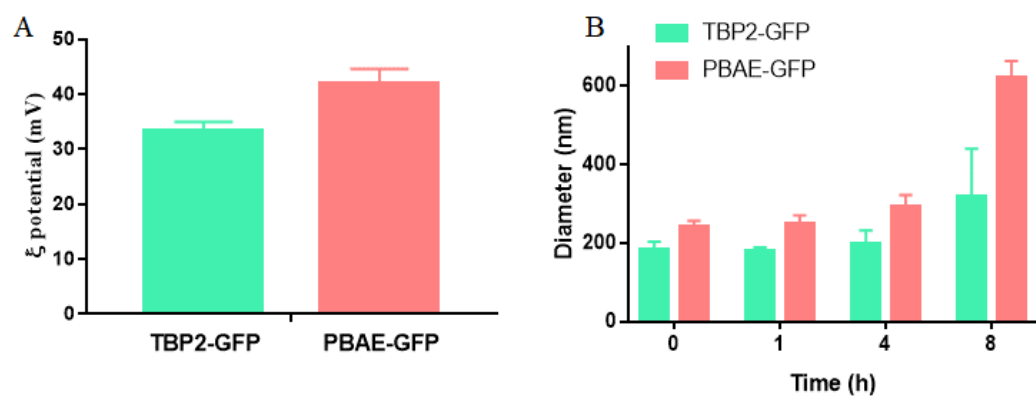

Figure S8.  $\zeta$ -potential (A) and particle size change (B) of TBP2-GFP and PBAE-GFP polyplex

NPs at mass ratio of 75:1 measured by DLS. The data represents the average value of 3 tests.

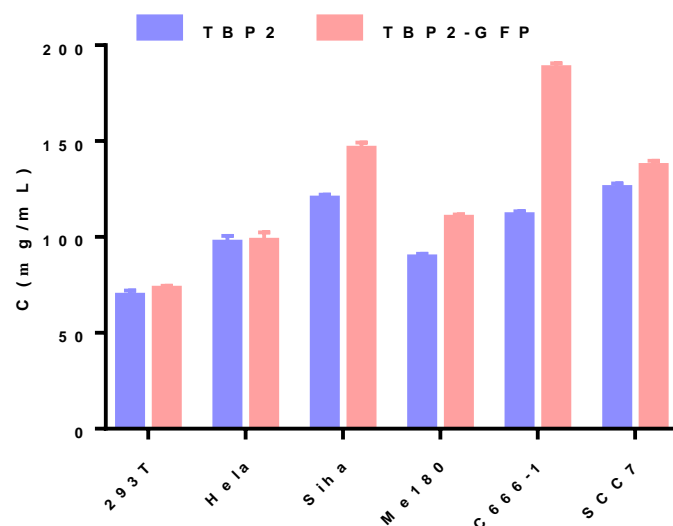

Figure S9. IC50 values of TBP2/TBP2-GFP in different cell lines as calculated by MTT assays.

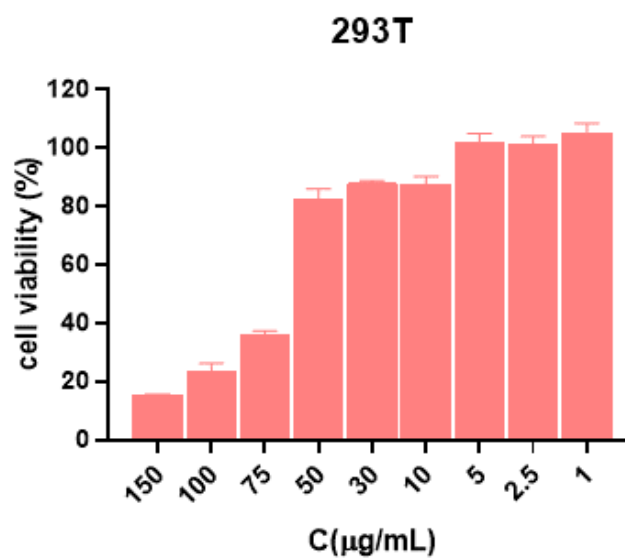

Figure S10. Cell viability testing of PBAE-GFP in 293T

## HeLa

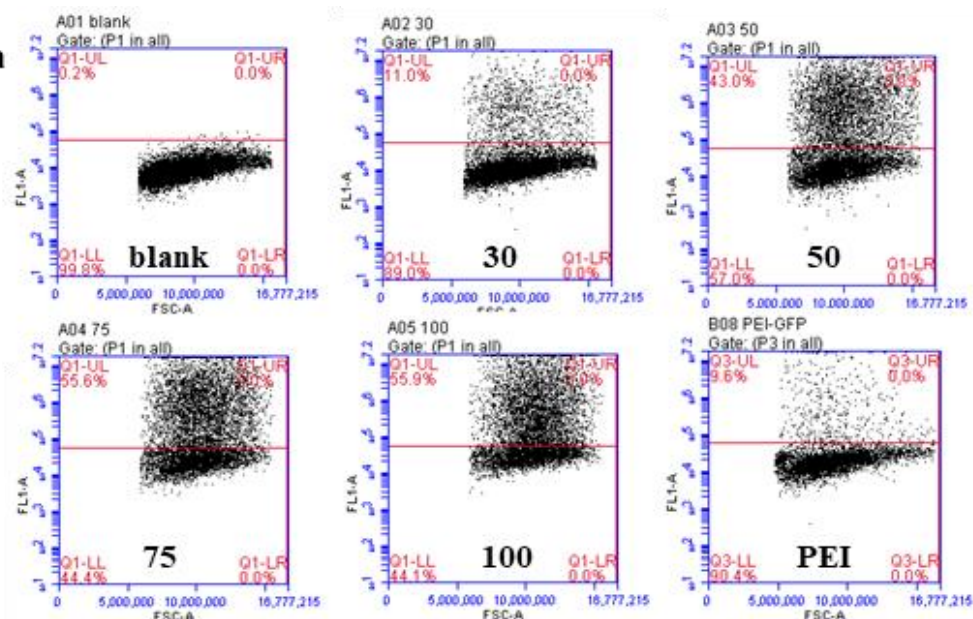

## Me180

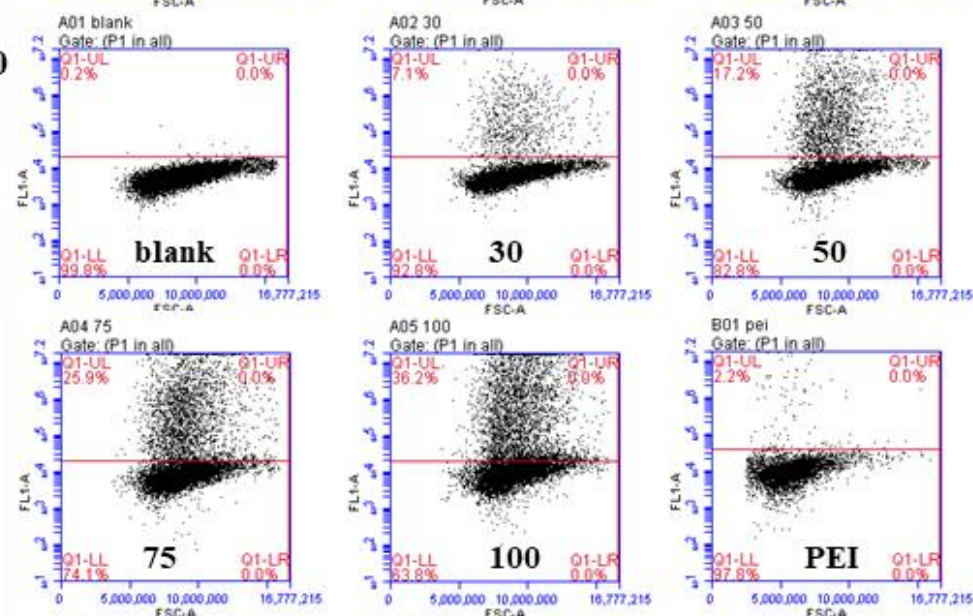

## SiHa

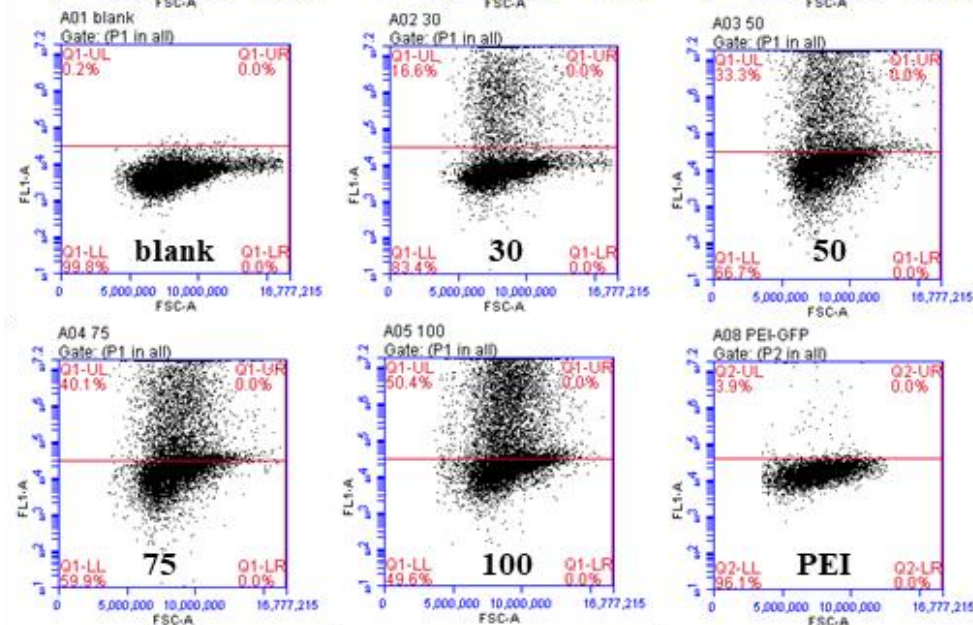



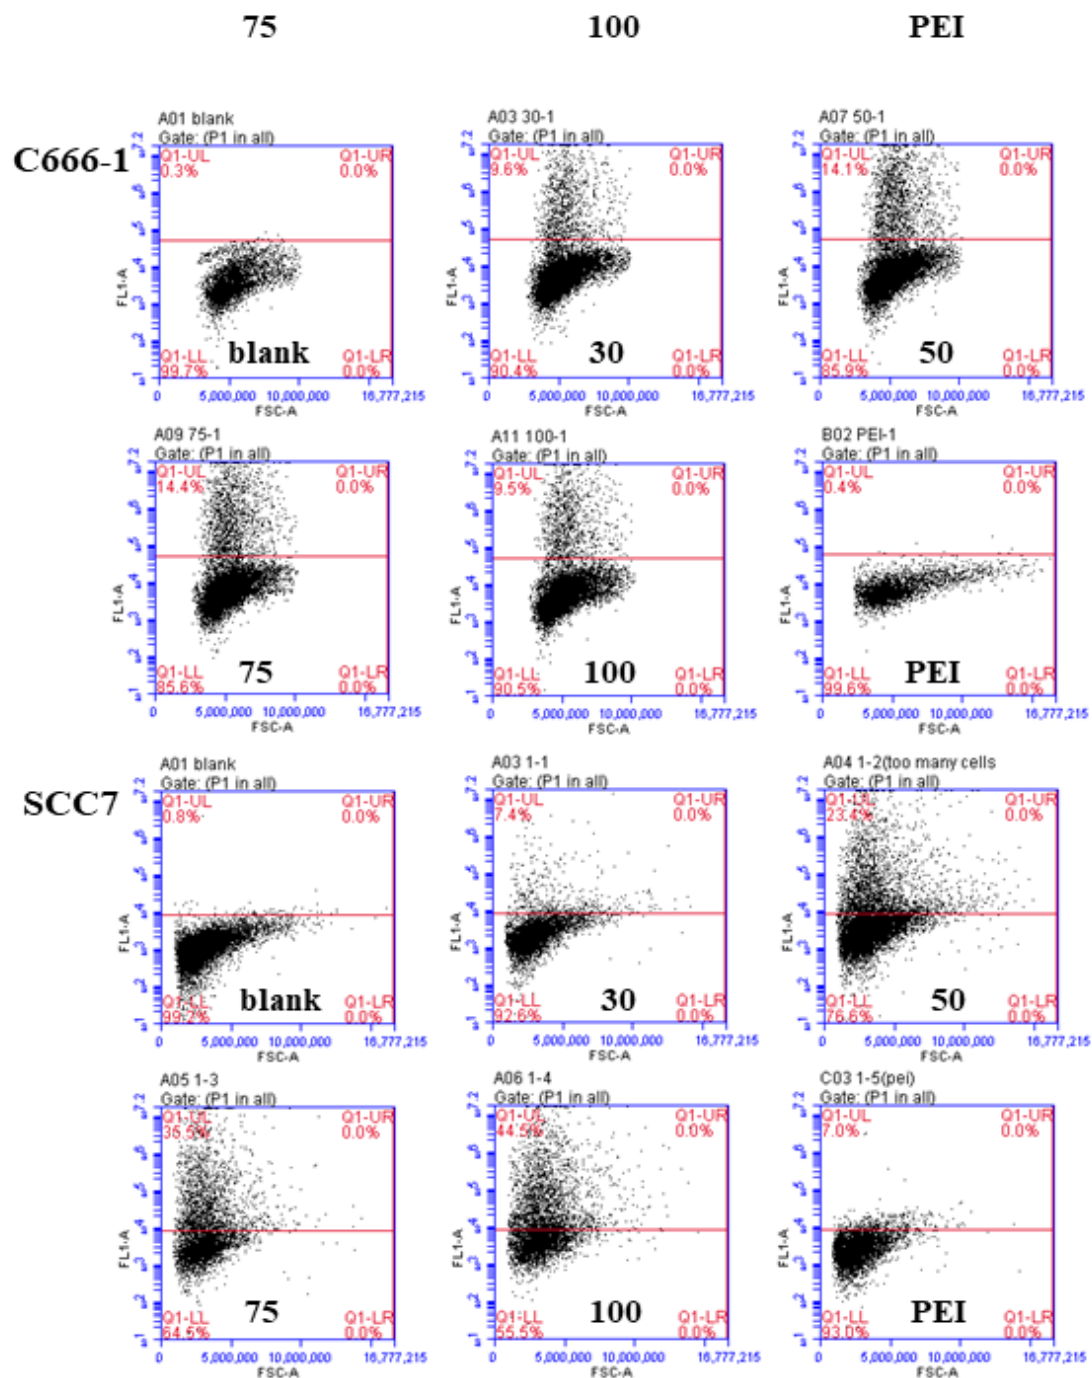

Figure S11. Representative cytometric analysis of transfection efficiency of 293T with TBP1, TBP2, TBP3-GFP polyplex NPs at mass ratio of 30:1, 50:1, 75:1, 100:1. (UL: GFP positive, LL: GFP negative)

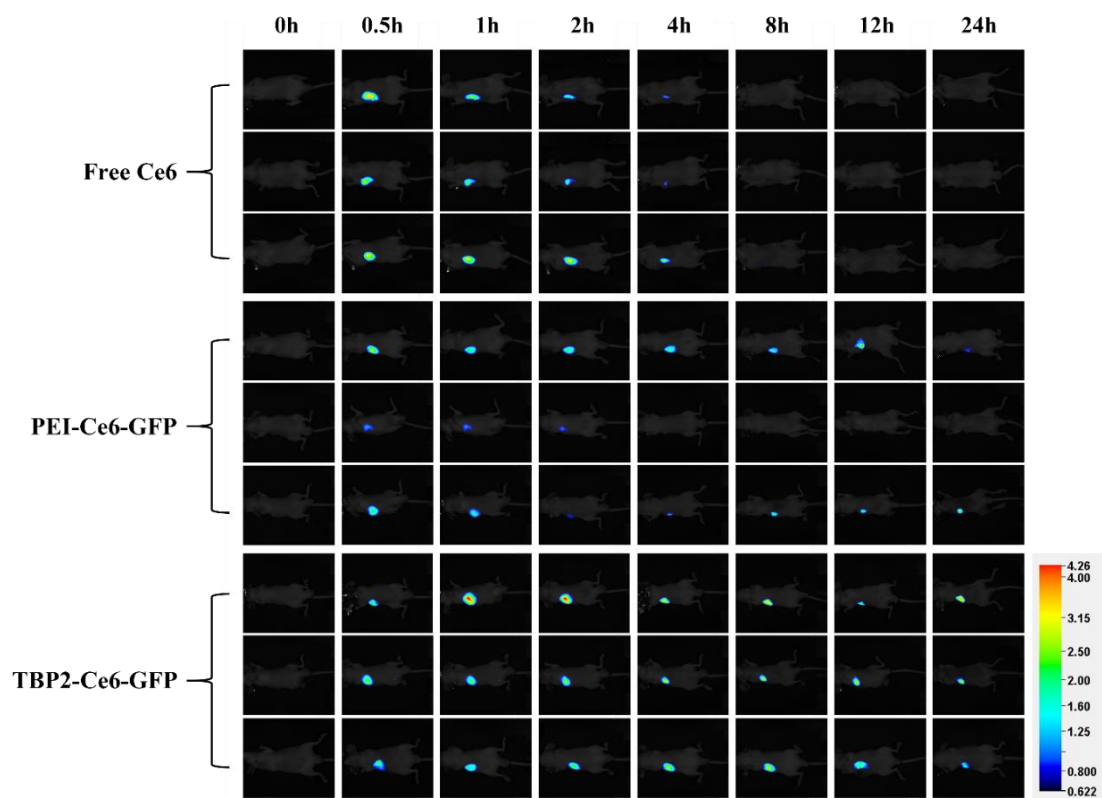

Figure S12. The distribution of drug in each group after injection over time(n=3)

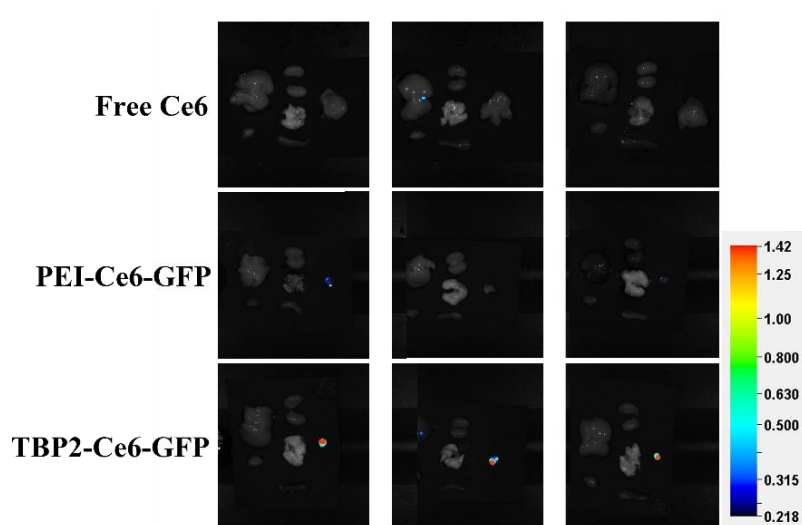

Figure S13. The fluorescence intensity of major organs in each group at 24 hours after injection

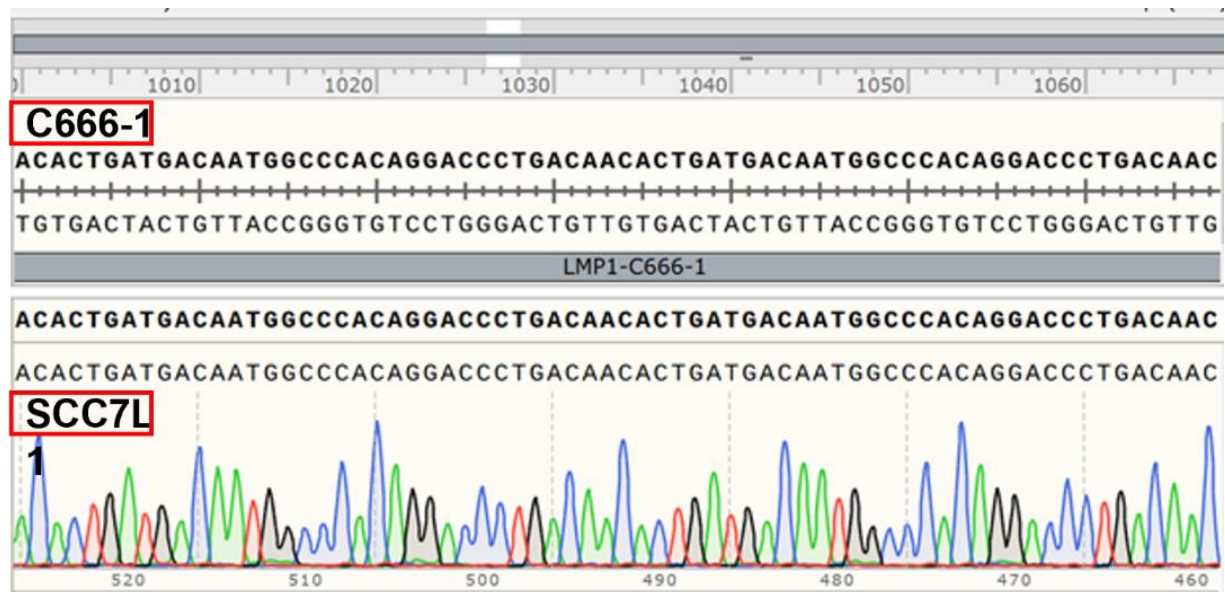

Figure S14. Sanger sequencing results of C666-1 and SCC7L1 (C666-1 above and SCC7L below, showing the same gene fragment sequence).

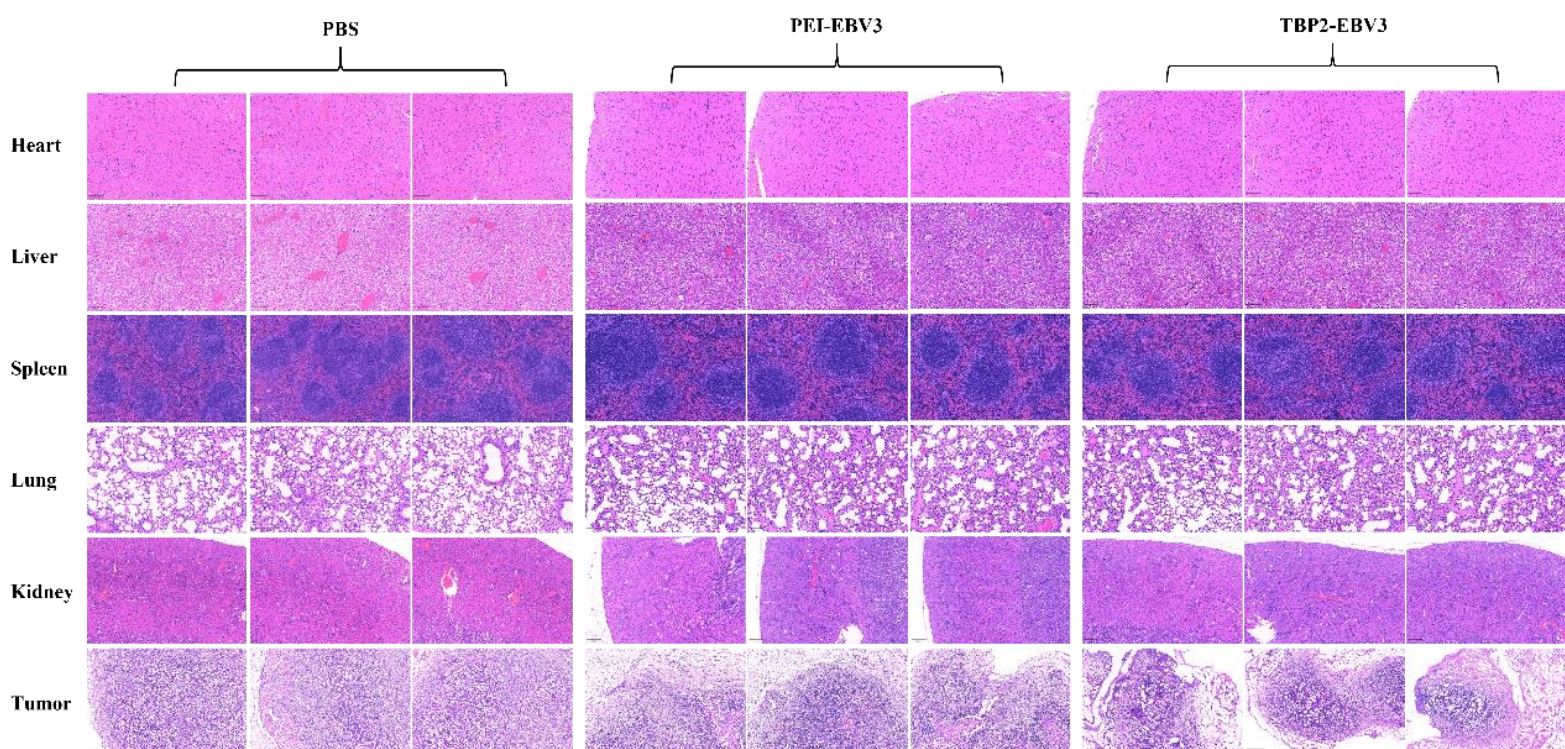

Figure S15. The H&E stained sections of tumors and major organs in each group

Table S1. Former and reverse primers of MUC and ODN

| primer                                    | sequence                   |
|-------------------------------------------|----------------------------|
| MUC2-F                                    | CAGCACGTCATCCTGAAGGT       |
| MUC2-R                                    | AAGACACCCTGGAGACACCT       |
| ODN-F                                     | TTGAGTTGTCATATGTTAATAACGGT |
| ODN-R                                     | ACCGTTATTAACATATGACAACTCAA |
| ACTGP-9A5BE2F6-BD82435F-D6B74D98-DB8CC766 |                            |
